# Supplementary material for: Linoleoyl-lysophosphatidylcholine suppresses immune-related adverse events due to immune checkpoint blockade
Source: PubMed Central journal article supplement — medRxiv. 2024 Aug 8:2024.08.07.24310974. Preprint. [Version 1] doi: 10.1101/2024.08.07.24310974 (PMC11326322; doi:10.1101/2024.08.07.24310974), 2024-08-08
Supplement: media-1.pdf [file media-1.pdf]

## Supplementary Table 1

|                                                       | <b>Cohort 1<br/>(Ipilimumab)</b> | <b>Cohort 2<br/>(Mixed ICB)</b>                                                                                                                                       | <b>Cohort 3<br/>(Pembrolizumab)</b>           |
|-------------------------------------------------------|----------------------------------|-----------------------------------------------------------------------------------------------------------------------------------------------------------------------|-----------------------------------------------|
| Location                                              | UK Southampton                   | UCSD-Moores Cancer Center                                                                                                                                             | Yale University                               |
| Total Patients (n)                                    | 87                               | 62                                                                                                                                                                    | 58                                            |
| Patients with Serial Sampling (n)                     | 65                               | 32                                                                                                                                                                    | 53                                            |
| Total Serial Samples                                  | 253                              | 143                                                                                                                                                                   | 357                                           |
| Age (Range)                                           | 61 (19-81)                       | 60 (27-87)                                                                                                                                                            | 68 (47-92)                                    |
| Men (%)                                               | 47 (54)                          | 36 (58)                                                                                                                                                               | 23 (40)                                       |
| Tumor Histology (%)                                   | Melanoma (100)                   | Melanoma (27), NSCLC (23), HNSCC (18), Breast (11), Colorectal (8), Skin (Non-Melanoma) (5), Renal (2), SCLC (2), Myoepithelial (2), Appendiceal (2), Small Bowel (2) | NSCLC (92), Melanoma (8)                      |
| Therapy (%)                                           | Ipilimumab (100)                 | Pembrolizumab (42), Nivolumab (24), Ipilimumab + Nivolumab (21), Ipilimumab (6), Pembrolizumab + SBRT (3), Tremelimumab + anti-PD-L1 (2), Avelumab (2)                | Pembrolizumab (78), Pembrolizumab + SBRT (22) |
| RECIST 1.1 %<br>(CR:PR:SD:PD)                         | 1:11:10:60                       | 0:13:27:48                                                                                                                                                            | 0:30:16:42                                    |
| irAE Severity %<br>(None : Grade I/II : Grade III/IV) | 41:52:7                          | 52:31:18                                                                                                                                                              | 28:61:12                                      |

## Supplementary Table 2

### Cohort 1: Ipilimumab-Treated Advanced Melanoma UK Southampton

|                           | Total      | None       | Grade I/II | Grade III/IV | p-value |
|---------------------------|------------|------------|------------|--------------|---------|
| n (%)                     | 65 (100)   | 23 (35)    | 37 (57)    | 5 (8)        | --      |
| Male<br>(% per Group)     | 37 (57)    | 18 (78)    | 18 (49)    | 1 (20)       | 0.11    |
| Age (Range)               | 63 (19-81) | 57 (44-72) | 65 (19-76) | 70 (53-81)   | 0.13    |
| Response<br>(% per Group) | 17 (31)    | 6 (40)     | 10 (28)    | 1 (33)       | 0.83    |

# Supplementary Table 3

## Cohort 1: Ipilimumab-Treated Melanoma Maximum Excursion Associations for Identified Metabolites

| ID                         | class      | adduct        | m/z      | irAE log(OR)          | irAE pval | RECIST log(OR)       | RECIST pval |
|----------------------------|------------|---------------|----------|-----------------------|-----------|----------------------|-------------|
| b-Muricholic Acid          | Bile Acid  | [M-H]         | 407.2805 | 0.08 [0.01 - 0.17]    | 4.14E-02  | 0.02 [-0.07 - 0.12]  | 7.00E-01    |
| Chenodeoxycholic Acid      | Bile Acid  | [M-H+Acetate] | 451.3068 | 0.05 [-0.03 - 0.13]   | 2.74E-01  | -0.01 [-0.10 - 0.08] | 8.18E-01    |
| Deoxycholic Acid           | Bile Acid  | [M-H]         | 391.2861 | -0.01 [-0.08 - 0.07]  | 8.52E-01  | -0.03 [-0.12 - 0.05] | 3.99E-01    |
| Glycochenodeoxycholic Acid | Bile Acid  | [M-H]         | 448.3075 | -0.19 [-0.38 - -0.01] | 4.29E-02  | 0.04 [-0.13 - 0.22]  | 6.46E-01    |
| Glycoursodeoxycholic Acid  | Bile Acid  | [M-H]         | 448.3071 | -0.18 [-0.32 - -0.06] | 7.30E-03  | -0.08 [-0.22 - 0.05] | 2.45E-01    |
| Lithocholic Acid           | Bile Acid  | [M-H+Acetate] | 435.3115 | -0.08 [-0.22 - 0.06]  | 2.76E-01  | -0.05 [-0.20 - 0.10] | 4.83E-01    |
| Taurochenodeoxycholic Acid | Bile Acid  | [M-H]         | 498.2843 | -0.02 [-0.16 - 0.12]  | 7.82E-01  | -0.10 [-0.25 - 0.04] | 1.59E-01    |
| Tauroursodeoxycholic Acid  | Bile Acid  | [M-H]         | 498.2903 | -0.14 [-0.28 - -0.02] | 3.20E-02  | -0.04 [-0.17 - 0.09] | 5.92E-01    |
| 10,11-DiHDPA               | Docosanoid | [M-H]         | 361.2386 | 0.21 [-0.02 - 0.46]   | 7.93E-02  | 0.03 [-0.22 - 0.27]  | 8.20E-01    |
| 13,14-EpDPA                | Docosanoid | [M-H]         | 343.2283 | 0.06 [-0.08 - 0.20]   | 4.36E-01  | 0.02 [-0.13 - 0.19]  | 7.55E-01    |
| 19,20-DiHDPA               | Docosanoid | [M-H]         | 361.2389 | -0.13 [-0.42 - 0.14]  | 3.51E-01  | 0.13 [-0.14 - 0.43]  | 3.58E-01    |
| 7,8-DiHDPA                 | Docosanoid | [M-H]         | 361.2423 | -1.19 [-2.49 - 0.04]  | 6.39E-02  | 0.41 [-0.80 - 1.68]  | 5.12E-01    |
| MCTR2                      | Docosanoid | [M-H]         | 519.247  | 0.04 [-0.29 - 0.38]   | 8.18E-01  | 0.02 [-0.33 - 0.39]  | 9.00E-01    |
| Resolvin D1                | Docosanoid | [M-H]         | 375.2218 | 0.09 [-0.18 - 0.37]   | 5.08E-01  | 0.14 [-0.16 - 0.47]  | 3.86E-01    |
| 11(12)-EpETE               | Eicosanoid | [M-H]         | 317.2125 | 0.22 [0.04 - 0.43]    | 2.42E-02  | 0.26 [0.05 - 0.51]   | 2.14E-02    |
| 11,12-diHETrE              | Eicosanoid | [M-H+Acetate] | 397.2578 | 0.09 [-0.15 - 0.33]   | 4.57E-01  | 0.11 [-0.16 - 0.42]  | 4.51E-01    |
| 11b dhk PGF2a              | Eicosanoid | [M-H]         | 353.2338 | 0.12 [-0.31 - 0.55]   | 5.88E-01  | 0.13 [-0.34 - 0.62]  | 5.97E-01    |
| 11-beta-PGE1               | Eicosanoid | [M-H]         | 353.2336 | -0.04 [-0.31 - 0.22]  | 7.39E-01  | 0.07 [-0.23 - 0.37]  | 6.41E-01    |
| 11-dehydro-2,3-dinor-TXB2  | Eicosanoid | [M-H+Acetate] | 399.1949 | 0.06 [-0.09 - 0.21]   | 4.65E-01  | -0.03 [-0.22 - 0.15] | 7.77E-01    |
| 11-HETE                    | Eicosanoid | [M-H]         | 319.2281 | 0.12 [0.01 - 0.23]    | 4.12E-02  | 0.11 [-0.01 - 0.23]  | 8.10E-02    |
| 12,13 diHOME               | Eicosanoid | [M-H]         | 313.2388 | 0.09 [-0.06 - 0.25]   | 2.52E-01  | -0.02 [-0.19 - 0.15] | 7.95E-01    |
| 12,13 EpOME                | Eicosanoid | [M-H]         | 295.2281 | 0.03 [-0.27 - 0.34]   | 8.34E-01  | 0.17 [-0.16 - 0.53]  | 3.17E-01    |
| 12-HHTrE                   | Eicosanoid | [M-H]         | 279.1969 | 0.08 [0.01 - 0.15]    | 3.41E-02  | 0.12 [0.03 - 0.23]   | 1.60E-02    |
| 12-OPDA                    | Eicosanoid | [M-H+Acetate] | 351.2162 | 0.01 [-0.28 - 0.29]   | 9.65E-01  | 0.25 [-0.08 - 0.63]  | 1.53E-01    |
| 12-oxoETE                  | Eicosanoid | [M-H]         | 317.2122 | -0.01 [-0.20 - 0.17]  | 8.97E-01  | 0.07 [-0.13 - 0.27]  | 4.73E-01    |
| 12S-HpEPE                  | Eicosanoid | [M-H]         | 333.205  | -0.08 [-0.28 - 0.12]  | 4.51E-01  | 0.33 [0.05 - 0.65]   | 3.26E-02    |

| ID                                       | class      | adduct        | m/z      | irAE log(OR)         | irAE pval | RECIST log(OR)       | RECIST pval |
|------------------------------------------|------------|---------------|----------|----------------------|-----------|----------------------|-------------|
| 12S-HpETE                                | Eicosanoid | [M-H]         | 335.2228 | 0.33 [0.07 - 0.63]   | 1.77E-02  | 0.28 [0.00 - 0.58]   | 5.16E-02    |
| 13(S) HOTrE(y)                           | Eicosanoid | [M-H+Acetate] | 353.2313 | 0.08 [-0.19 - 0.35]  | 5.45E-01  | 0.36 [0.05 - 0.72]   | 3.33E-02    |
| 13,14-dihydro-15-keto-PGA2               | Eicosanoid | [M-H+Acetate] | 393.2287 | -0.03 [-0.19 - 0.13] | 7.56E-01  | -0.08 [-0.28 - 0.10] | 3.87E-01    |
| 13,14-dihydro-15-keto-tetranor-PGF1alpha | Eicosanoid | [M-H+Acetate] | 359.2108 | -0.02 [-0.58 - 0.55] | 9.50E-01  | -0.07 [-0.68 - 0.54] | 8.12E-01    |
| 13,14-dihydro-PGE1                       | Eicosanoid | [M-H]         | 355.2462 | -0.10 [-0.87 - 0.69] | 8.09E-01  | 0.39 [-0.53 - 1.73]  | 5.04E-01    |
| 13-HODE                                  | Eicosanoid | [M-H]         | 295.228  | -0.08 [-0.27 - 0.10] | 4.15E-01  | 0.10 [-0.09 - 0.30]  | 3.11E-01    |
| 13-HpODE                                 | Eicosanoid | [M-H]         | 311.2233 | -0.11 [-0.37 - 0.14] | 3.80E-01  | 0.05 [-0.25 - 0.34]  | 7.57E-01    |
| 13-oxoODE                                | Eicosanoid | [M-H+Acetate] | 353.2315 | -0.05 [-0.30 - 0.18] | 6.71E-01  | 0.12 [-0.14 - 0.42]  | 3.68E-01    |
| 13S-HpOTrEy                              | Eicosanoid | [M-H]         | 309.2074 | -0.10 [-0.31 - 0.11] | 3.69E-01  | 0.14 [-0.12 - 0.42]  | 3.15E-01    |
| 14(15) EpETE                             | Eicosanoid | [M-H]         | 317.2119 | 0.20 [-0.11 - 0.53]  | 2.18E-01  | NA [NA - NA]         | NA          |
| 14,15 LTD4                               | Eicosanoid | [M-H]         | 495.2607 | 0.15 [-0.04 - 0.36]  | 1.26E-01  | 0.14 [-0.08 - 0.38]  | 2.26E-01    |
| 14,15-DiHETE                             | Eicosanoid | [M-H+Acetate] | 395.2419 | 0.04 [-0.18 - 0.27]  | 7.25E-01  | -0.18 [-0.47 - 0.07] | 1.81E-01    |
| 14,15-diHETrE                            | Eicosanoid | [M-H+Acetate] | 397.2624 | 0.40 [0.01 - 0.83]   | 5.66E-02  | 0.22 [-0.22 - 0.68]  | 3.36E-01    |
| 14,15-EET                                | Eicosanoid | [M-H]         | 319.2292 | 0.02 [-0.18 - 0.23]  | 8.25E-01  | 0.09 [-0.13 - 0.32]  | 4.06E-01    |
| 15 oxoEDE                                | Eicosanoid | [M-H]         | 321.2437 | 0.06 [-0.20 - 0.33]  | 6.35E-01  | 0.19 [-0.08 - 0.48]  | 1.82E-01    |
| 15(S) HEPE                               | Eicosanoid | [M-H]         | 317.2124 | 0.03 [-0.08 - 0.14]  | 5.75E-01  | 0.02 [-0.10 - 0.14]  | 6.96E-01    |
| 15(S) HETrE                              | Eicosanoid | [M-H]         | 321.2437 | 0.04 [-0.06 - 0.14]  | 4.07E-01  | 0.06 [-0.05 - 0.17]  | 2.60E-01    |
| 15d PGA2                                 | Eicosanoid | [M-H]         | 315.1967 | 0.23 [-0.14 - 0.66]  | 2.49E-01  | -0.16 [-0.65 - 0.25] | 4.73E-01    |
| 15d PGJ2                                 | Eicosanoid | [M-H]         | 315.2003 | 0.11 [-0.24 - 0.48]  | 5.40E-01  | 0.32 [-0.08 - 0.75]  | 1.30E-01    |
| 15-epi-PGA1                              | Eicosanoid | [M-H+Acetate] | 395.2441 | -0.02 [-0.60 - 0.55] | 9.34E-01  | -0.12 [-0.72 - 0.45] | 6.94E-01    |
| 15-HETE                                  | Eicosanoid | [M-H+Acetate] | 379.2473 | 0.09 [-0.19 - 0.36]  | 5.27E-01  | 0.04 [-0.25 - 0.34]  | 7.92E-01    |
| 15-keto-PGA1                             | Eicosanoid | [M-H+Acetate] | 393.2307 | 0.19 [-0.14 - 0.54]  | 2.72E-01  | -0.10 [-0.48 - 0.26] | 5.96E-01    |
| 15S-HpETE                                | Eicosanoid | [M-H]         | 335.2227 | 0.09 [-0.14 - 0.33]  | 4.44E-01  | 0.32 [0.03 - 0.64]   | 3.93E-02    |
| 17k DPA                                  | Eicosanoid | [M-H+Acetate] | 403.2462 | 0.08 [-0.04 - 0.21]  | 1.91E-01  | NA [NA - NA]         | NA          |
| 18(+/-)-HETE                             | Eicosanoid | [M-H]         | 319.2232 | 0.15 [-0.47 - 0.77]  | 6.40E-01  | 0.73 [-0.08 - 1.71]  | 1.06E-01    |
| 20cooh AA                                | Eicosanoid | [M-H]         | 333.2083 | -0.13 [-0.62 - 0.36] | 5.96E-01  | 0.05 [-0.49 - 0.58]  | 8.57E-01    |
| 5(S) HEPE                                | Eicosanoid | [M-H+Acetate] | 377.2312 | 0.04 [-0.22 - 0.29]  | 7.71E-01  | 0.05 [-0.22 - 0.32]  | 7.07E-01    |

| ID                                     | class      | adduct        | m/z      | irAE log(OR)          | irAE pval | RECIST log(OR)       | RECIST pval |
|----------------------------------------|------------|---------------|----------|-----------------------|-----------|----------------------|-------------|
| 5(S) HETrE                             | Eicosanoid | [M-H]         | 321.2437 | -0.07 [-0.29 - 0.15]  | 5.44E-01  | 0.21 [-0.01 - 0.45]  | 7.17E-02    |
| 5,12-DiHETE                            | Eicosanoid | [M-H]         | 335.2232 | 0.12 [-0.03 - 0.28]   | 1.26E-01  | 0.13 [-0.03 - 0.30]  | 1.16E-01    |
| 5,6-diHETE                             | Eicosanoid | [M-H]         | 335.2238 | -0.04 [-0.38 - 0.29]  | 7.89E-01  | 0.22 [-0.14 - 0.61]  | 2.39E-01    |
| 5,6-diHETrE                            | Eicosanoid | [M-H]         | 337.2386 | 0.07 [-0.36 - 0.49]   | 7.59E-01  | -0.16 [-0.66 - 0.33] | 5.33E-01    |
| 5,6-EET                                | Eicosanoid | [M-H]         | 319.2281 | 0.09 [-0.14 - 0.32]   | 4.17E-01  | 0.20 [-0.05 - 0.45]  | 1.16E-01    |
| 5-HETE                                 | Eicosanoid | [M-H]         | 319.2282 | 0.09 [-0.02 - 0.22]   | 1.19E-01  | 0.14 [0.01 - 0.29]   | 4.57E-02    |
| 5-oxoETE                               | Eicosanoid | [M-H]         | 317.2126 | 0.00 [-0.21 - 0.20]   | 9.83E-01  | 0.11 [-0.07 - 0.30]  | 2.36E-01    |
| 5S-HpEPE                               | Eicosanoid | [M-H]         | 333.205  | -0.14 [-0.40 - 0.10]  | 2.54E-01  | 0.45 [0.16 - 0.79]   | 4.95E-03    |
| 6t LTB4                                | Eicosanoid | [M-H]         | 335.2232 | 0.13 [-0.01 - 0.29]   | 8.19E-02  | 0.15 [-0.01 - 0.33]  | 7.90E-02    |
| 7 HDoHE                                | Eicosanoid | [M-H]         | 343.2277 | 0.03 [-0.14 - 0.20]   | 7.39E-01  | 0.06 [-0.13 - 0.26]  | 5.32E-01    |
| 8(9)-EpETE                             | Eicosanoid | [M-H+Acetate] | 377.2303 | -0.06 [-0.31 - 0.20]  | 6.61E-01  | -0.03 [-0.30 - 0.24] | 8.08E-01    |
| 8(S) HEPE                              | Eicosanoid | [M-H]         | 317.2125 | 0.11 [-0.06 - 0.29]   | 2.00E-01  | 0.07 [-0.12 - 0.27]  | 4.45E-01    |
| 8(S) HETrE                             | Eicosanoid | [M-H+Acetate] | 381.2614 | -0.14 [-0.36 - 0.05]  | 1.71E-01  | 0.09 [-0.11 - 0.29]  | 3.60E-01    |
| 8,12-iso-iPF2 $\alpha$ -VI-1,5-lactone | Eicosanoid | [M-H]         | 335.2229 | 0.15 [-0.11 - 0.42]   | 2.60E-01  | 0.21 [-0.10 - 0.53]  | 1.90E-01    |
| 8,12-iso-iPF2 $\alpha$ -VI $\gamma$    | Eicosanoid | [M-H]         | 353.2334 | 0.20 [0.02 - 0.39]    | 3.64E-02  | 0.12 [-0.07 - 0.31]  | 2.08E-01    |
| 8,15-diHETE                            | Eicosanoid | [M-H]         | 335.2231 | 0.17 [-0.11 - 0.45]   | 2.28E-01  | 0.15 [-0.16 - 0.48]  | 3.35E-01    |
| 8,9-diHETrE                            | Eicosanoid | [M-H+Acetate] | 397.2574 | 0.03 [-0.16 - 0.23]   | 7.29E-01  | 0.09 [-0.13 - 0.31]  | 4.25E-01    |
| 8,9-EET                                | Eicosanoid | [M-H]         | 319.2287 | 0.06 [-0.23 - 0.36]   | 6.69E-01  | NA [NA - NA]         | NA          |
| 8-iso-PGA1                             | Eicosanoid | [M-H]         | 335.2231 | -0.09 [-0.31 - 0.12]  | 3.85E-01  | -0.07 [-0.33 - 0.17] | 5.61E-01    |
| 8-iso-PGF1a                            | Eicosanoid | [M-H]         | 355.2485 | -0.27 [-0.55 - -0.02] | 4.39E-02  | -0.03 [-0.32 - 0.25] | 8.11E-01    |
| 9(S) HOTrE                             | Eicosanoid | [M-H]         | 293.2126 | 0.08 [-0.08 - 0.26]   | 3.21E-01  | 0.07 [-0.11 - 0.25]  | 4.69E-01    |
| 9,10 EpOME                             | Eicosanoid | [M-H]         | 295.2269 | 0.10 [-0.36 - 0.56]   | 6.64E-01  | 0.21 [-0.25 - 0.67]  | 3.58E-01    |
| 9-HpODE                                | Eicosanoid | [M-H]         | 311.2217 | -0.10 [-0.30 - 0.09]  | 2.96E-01  | 0.04 [-0.19 - 0.25]  | 6.92E-01    |
| 9-oxoODE                               | Eicosanoid | [M-H]         | 293.2125 | -0.05 [-0.37 - 0.26]  | 7.47E-01  | 0.02 [-0.30 - 0.35]  | 8.86E-01    |
| 9-oxoOTrE                              | Eicosanoid | [M-H]         | 291.1968 | 0.04 [-0.16 - 0.25]   | 6.79E-01  | 0.10 [-0.11 - 0.34]  | 3.51E-01    |
| 9S-HpOTrE                              | Eicosanoid | [M-H]         | 309.2074 | -0.03 [-0.27 - 0.21]  | 7.90E-01  | 0.19 [-0.10 - 0.49]  | 2.03E-01    |
| ent-8-iso Prostaglandin F2 $\alpha$    | Eicosanoid | [M-H]         | 353.234  | -0.05 [-0.58 - 0.50]  | 8.66E-01  | 0.66 [-0.11 - 1.64]  | 1.50E-01    |

| ID                               | class           | adduct        | m/z      | irAE log(OR)         | irAE pval | RECIST log(OR)       | RECIST pval |
|----------------------------------|-----------------|---------------|----------|----------------------|-----------|----------------------|-------------|
| HXA3                             | Eicosanoid      | [M-H]         | 335.2234 | 0.20 [0.02 - 0.40]   | 3.84E-02  | 0.20 [0.00 - 0.42]   | 5.98E-02    |
| PDX                              | Eicosanoid      | [M-H+Acetate] | 419.2386 | 0.35 [-0.12 - 0.87]  | 1.58E-01  | 0.92 [0.35 - 1.60]   | 3.15E-03    |
| PGD2                             | Eicosanoid      | [M-H]         | 351.218  | 0.09 [-0.12 - 0.30]  | 4.25E-01  | -0.02 [-0.25 - 0.19] | 8.24E-01    |
| Resolvin E1                      | Eicosanoid      | [M-H]         | 349.2023 | 0.04 [-0.05 - 0.13]  | 4.15E-01  | -0.03 [-0.13 - 0.07] | 5.14E-01    |
| tetranor 12(R) HETE              | Eicosanoid      | [M-H+Acetate] | 325.2027 | -0.06 [-0.29 - 0.17] | 6.30E-01  | 0.69 [0.32 - 1.17]   | 1.36E-03    |
| D-erythro-Sphingosine C-18       | Endocannabinoid | [M-H+Acetate] | 358.2961 | 0.22 [-0.15 - 0.61]  | 2.53E-01  | 0.38 [-0.06 - 0.85]  | 9.88E-02    |
| Docosahexaenoyl Ethanolamide     | Endocannabinoid | [M-H+Acetate] | 430.2968 | 0.20 [-0.13 - 0.55]  | 2.38E-01  | 0.26 [-0.08 - 0.62]  | 1.42E-01    |
| N-oleoyl Dopamine                | Endocannabinoid | [M-H]         | 416.3105 | 0.12 [-0.08 - 0.33]  | 2.40E-01  | 0.04 [-0.17 - 0.27]  | 6.84E-01    |
| Oleoyl Ethanolamide              | Endocannabinoid | [M-H+Acetate] | 384.3121 | 0.00 [-0.28 - 0.28]  | 9.99E-01  | -0.03 [-0.35 - 0.28] | 8.36E-01    |
| Adrenic Acid                     | Free Fatty Acid | [M-H]         | 331.2603 | -0.02 [-0.15 - 0.12] | 7.90E-01  | 0.03 [-0.14 - 0.19]  | 7.05E-01    |
| $\alpha$ -linolenic Acid         | Free Fatty Acid | [M-H]         | 277.2172 | 0.04 [-0.14 - 0.23]  | 6.38E-01  | 0.13 [-0.07 - 0.34]  | 2.18E-01    |
| Arachidic Acid                   | Free Fatty Acid | [M-H]         | 311.2957 | 0.11 [-0.30 - 0.53]  | 6.08E-01  | 0.56 [0.07 - 1.12]   | 3.47E-02    |
| Arachidonic Acid                 | Free Fatty Acid | [M-H]         | 303.2329 | 0.17 [-0.20 - 0.54]  | 3.66E-01  | 0.00 [-0.44 - 0.41]  | 9.89E-01    |
| Behenic Acid                     | Free Fatty Acid | [M-H]         | 339.3269 | 0.09 [-0.15 - 0.34]  | 4.51E-01  | 0.10 [-0.16 - 0.39]  | 4.62E-01    |
| Dihomo- $\gamma$ -linolenic Acid | Free Fatty Acid | [M-H]         | 305.2492 | 0.19 [-0.11 - 0.51]  | 2.32E-01  | 0.05 [-0.29 - 0.40]  | 7.75E-01    |
| Docosadienoic Acid               | Free Fatty Acid | [M-H]         | 335.2961 | 0.04 [-0.18 - 0.26]  | 7.53E-01  | 0.13 [-0.13 - 0.38]  | 3.29E-01    |
| Docosaenoic Acid                 | Free Fatty Acid | [M-H]         | 337.3118 | 0.14 [-0.11 - 0.39]  | 2.78E-01  | 0.10 [-0.16 - 0.37]  | 4.47E-01    |
| Docosahexaenoic Acid             | Free Fatty Acid | [M-H]         | 327.2329 | -0.02 [-0.30 - 0.25] | 8.65E-01  | 0.20 [-0.10 - 0.52]  | 1.94E-01    |
| Docosapentaenoic Acid            | Free Fatty Acid | [M-H]         | 329.2491 | 0.01 [-0.17 - 0.19]  | 9.19E-01  | 0.11 [-0.09 - 0.32]  | 2.74E-01    |
| Docosatrienoic Acid              | Free Fatty Acid | [M-H]         | 333.2805 | 0.04 [-0.15 - 0.24]  | 6.55E-01  | 0.10 [-0.10 - 0.32]  | 3.24E-01    |
| Eicosadienoic Acid               | Free Fatty Acid | [M-H]         | 307.2645 | 0.01 [-0.18 - 0.20]  | 9.43E-01  | 0.22 [0.01 - 0.45]   | 4.60E-02    |
| Eicosapentaenoic Acid            | Free Fatty Acid | [M-H]         | 301.2173 | 0.03 [-0.13 - 0.20]  | 7.06E-01  | 0.02 [-0.15 - 0.29]  | 8.10E-01    |
| Eicosatrienoic Acid              | Free Fatty Acid | [M-H]         | 305.2488 | 0.10 [-0.12 - 0.34]  | 3.68E-01  | 0.08 [-0.18 - 0.34]  | 5.48E-01    |
| Eicosenoic Acid                  | Free Fatty Acid | [M-H]         | 309.2799 | 0.05 [-0.11 - 0.22]  | 5.29E-01  | 0.16 [-0.02 - 0.35]  | 8.05E-02    |
| Gondolic Acid                    | Free Fatty Acid | [M-H]         | 309.2799 | 0.04 [-0.12 - 0.21]  | 5.91E-01  | 0.16 [-0.02 - 0.35]  | 7.55E-02    |
| Heptadecaenoic Acid              | Free Fatty Acid | [M-H+Acetate] | 327.2545 | -0.07 [-0.18 - 0.05] | 2.64E-01  | -0.04 [-0.17 - 0.08] | 5.36E-01    |
| Heptadecanoic Acid               | Free Fatty Acid | [M-H]         | 269.2485 | 0.03 [-0.26 - 0.31]  | 8.62E-01  | 0.25 [-0.07 - 0.59]  | 1.43E-01    |

| ID                 | class           | adduct        | m/z      | irAE log(OR)           | irAE pval | RECIST log(OR)        | RECIST pval |
|--------------------|-----------------|---------------|----------|------------------------|-----------|-----------------------|-------------|
| Lignoceric Acid    | Free Fatty Acid | [M-H]         | 367.3581 | 0.12 [-0.17 - 0.41]    | 4.27E-01  | 0.28 [-0.08 - 0.74]   | 1.76E-01    |
| Linoleic Acid      | Free Fatty Acid | [M-H]         | 279.2341 | 0.02 [-0.15 - 0.18]    | 8.41E-01  | 0.06 [-0.12 - 0.23]   | 5.26E-01    |
| Myristic Acid      | Free Fatty Acid | [M-H]         | 227.2013 | 0.00 [-0.54 - 0.55]    | 9.87E-01  | -0.39 [-0.98 - 0.19]  | 1.85E-01    |
| Nervonic Acid      | Free Fatty Acid | [M-H]         | 365.3427 | 0.10 [-0.23 - 0.45]    | 5.45E-01  | 0.36 [-0.01 - 0.76]   | 6.32E-02    |
| Oleic Acid         | Free Fatty Acid | [M-H]         | 281.2487 | 0.00 [-0.17 - 0.17]    | 9.72E-01  | 0.08 [-0.12 - 0.27]   | 4.38E-01    |
| Osbond Acid        | Free Fatty Acid | [M-H]         | 329.248  | 0.04 [-0.14 - 0.22]    | 6.62E-01  | 0.14 [-0.06 - 0.34]   | 1.67E-01    |
| Palmitic Acid      | Free Fatty Acid | [M-H+Acetate] | 315.2544 | -0.06 [-0.30 - 0.16]   | 5.88E-01  | 0.23 [-0.03 - 0.51]   | 8.64E-02    |
| Palmitoleic Acid   | Free Fatty Acid | [M-H+Acetate] | 313.2388 | -0.04 [-0.27 - 0.18]   | 7.06E-01  | -0.16 [-0.42 - 0.09]  | 2.10E-01    |
| Pentadecanoic Acid | Free Fatty Acid | [M-H]         | 241.2172 | 0.09 [-0.27 - 0.46]    | 6.21E-01  | 0.25 [-0.13 - 0.67]   | 2.05E-01    |
| Petroselenic Acid  | Free Fatty Acid | [M-H]         | 341.2701 | 0.01 [-0.19 - 0.20]    | 9.45E-01  | 0.05 [-0.18 - 0.28]   | 6.93E-01    |
| Tricosanoic Acid   | Free Fatty Acid | [M-H]         | 353.3427 | -0.22 [-0.50 - 0.05]   | 1.22E-01  | -0.02 [-0.31 - 0.28]  | 8.89E-01    |
| Tricosenoic Acid   | Free Fatty Acid | [M-H]         | 351.3271 | -0.13 [-0.46 - 0.19]   | 4.37E-01  | 0.10 [-0.23 - 0.43]   | 5.64E-01    |
| LPC (14:0), Peak 1 | Lysolipid       | [M+Cl-]       | 502.2706 | -0.22 [-0.76 - 0.30]   | 4.02E-01  | -1.01 [-1.73 - -0.38] | 3.20E-03    |
| LPC (14:0), Peak 2 | Lysolipid       | [M+Cl-]       | 502.2713 | 0.08 [-0.48 - 0.65]    | 7.84E-01  | -0.75 [-1.52 - -0.09] | 3.73E-02    |
| LPC (15:0), Peak 1 | Lysolipid       | [M-H+Acetate] | 540.3315 | 0.14 [-0.49 - 0.78]    | 6.67E-01  | -1.36 [-2.32 - -0.54] | 2.41E-03    |
| LPC (15:0), Peak 2 | Lysolipid       | [M-H+Acetate] | 540.3314 | -0.02 [-0.65 - 0.63]   | 9.61E-01  | -0.78 [-1.89 - -0.01] | 9.71E-02    |
| LPC (16:0), Peak 1 | Lysolipid       | [M+Cl-]       | 530.3024 | -1.03 [-4.72 - 2.46]   | 5.60E-01  | -2.90 [-7.83 - 1.28]  | 2.12E-01    |
| LPC (16:0), Peak 2 | Lysolipid       | [M+Cl-]       | 530.3024 | -6.53 [-11.46 - -2.28] | 4.63E-03  | 4.68 [0.02 - 9.92]    | 6.22E-02    |
| LPC (16:1), Peak 1 | Lysolipid       | [M-H+Acetate] | 552.3334 | 0.20 [-0.44 - 0.86]    | 5.40E-01  | -1.01 [-1.89 - -0.21] | 1.70E-02    |
| LPC (16:1), Peak 2 | Lysolipid       | [M-H+Acetate] | 552.3314 | 0.17 [-0.28 - 0.62]    | 4.67E-01  | -0.11 [-0.62 - 0.46]  | 6.50E-01    |
| LPC (17:0), Peak 1 | Lysolipid       | [M-H+Acetate] | 568.363  | -0.11 [-0.78 - 0.55]   | 7.40E-01  | -1.40 [-2.42 - -0.51] | 3.64E-03    |
| LPC (17:0), Peak 2 | Lysolipid       | [M-H+Acetate] | 568.3621 | -0.05 [-0.69 - 0.59]   | 8.69E-01  | -0.63 [-1.59 - 0.10]  | 1.26E-01    |
| LPC (17:1), Peak 1 | Lysolipid       | [M-H+Acetate] | 566.3475 | 0.26 [-0.26 - 0.80]    | 3.23E-01  | -0.33 [-1.02 - 0.26]  | 2.71E-01    |
| LPC (17:1), Peak 2 | Lysolipid       | [M-H+Acetate] | 566.3502 | 0.18 [-0.53 - 0.91]    | 6.24E-01  | -1.58 [-2.74 - -0.59] | 3.50E-03    |
| LPC (18:0), Peak 1 | Lysolipid       | [M+Cl-]       | 558.3333 | -0.02 [-0.51 - 0.48]   | 9.36E-01  | -0.07 [-0.62 - 0.63]  | 7.91E-01    |
| LPC (18:0), Peak 2 | Lysolipid       | [M+Cl-]       | 558.3334 | -0.63 [-2.36 - 1.12]   | 4.70E-01  | -0.49 [-2.40 - 1.44]  | 6.05E-01    |
| LPC (18:1), Peak 1 | Lysolipid       | [M-H+Acetate] | 580.3627 | 0.19 [-0.29 - 0.67]    | 4.30E-01  | -0.11 [-0.66 - 0.50]  | 6.70E-01    |

| ID                 | class     | adduct        | m/z      | irAE log(OR)          | irAE pval | RECIST log(OR)        | RECIST pval |
|--------------------|-----------|---------------|----------|-----------------------|-----------|-----------------------|-------------|
| LPC (18:1), Peak 2 | Lysolipid | [M-H+Acetate] | 580.3619 | 0.53 [-0.84 - 1.91]   | 4.48E-01  | -0.42 [-2.00 - 1.21]  | 5.64E-01    |
| LPC (18:2), Peak 1 | Lysolipid | [M+Cl-]       | 554.3004 | -0.15 [-1.15 - 0.85]  | 7.60E-01  | -1.14 [-2.43 - 0.02]  | 6.26E-02    |
| LPC (18:2), Peak 2 | Lysolipid | [M+Cl-]       | 554.3024 | -4.53 [-9.35 - -0.21] | 4.74E-02  | 2.19 [-2.41 - 7.53]   | 3.80E-01    |
| LPC (18:3), Peak 1 | Lysolipid | [M-H+Acetate] | 576.3323 | 0.03 [-0.43 - 0.49]   | 9.09E-01  | -0.28 [-0.80 - 0.25]  | 2.82E-01    |
| LPC (18:3), Peak 2 | Lysolipid | [M-H+Acetate] | 576.3314 | -0.04 [-0.48 - 0.39]  | 8.44E-01  | -0.16 [-0.63 - 0.33]  | 5.13E-01    |
| LPC (19:1)         | Lysolipid | [M-H+Acetate] | 594.3799 | 0.34 [-0.23 - 0.92]   | 2.46E-01  | -0.57 [-1.42 - 0.08]  | 1.17E-01    |
| LPC (20:1), Peak 1 | Lysolipid | [M-H+Acetate] | 608.3909 | -0.35 [-1.20 - 0.48]  | 4.11E-01  | -1.39 [-2.69 - -0.29] | 2.12E-02    |
| LPC (20:1), Peak 2 | Lysolipid | [M-H+Acetate] | 608.3928 | -0.20 [-0.94 - 0.54]  | 5.95E-01  | -0.88 [-1.91 - 0.02]  | 6.69E-02    |
| LPC (20:2), Peak 1 | Lysolipid | [M-H+Acetate] | 606.3781 | -0.01 [-0.55 - 0.55]  | 9.77E-01  | -0.51 [-1.25 - 0.12]  | 1.29E-01    |
| LPC (20:2), Peak 2 | Lysolipid | [M-H+Acetate] | 606.3787 | 0.22 [-0.34 - 0.79]   | 4.36E-01  | -0.26 [-0.91 - 0.37]  | 4.10E-01    |
| LPC (20:3), Peak 1 | Lysolipid | [M-H+Acetate] | 604.3636 | 0.28 [-0.41 - 1.00]   | 4.29E-01  | -0.65 [-1.50 - 0.14]  | 1.16E-01    |
| LPC (20:3), Peak 2 | Lysolipid | [M-H+Acetate] | 604.363  | 0.19 [-0.37 - 0.74]   | 5.13E-01  | -0.28 [-0.99 - 0.34]  | 3.58E-01    |
| LPC (20:4), Peak 1 | Lysolipid | [M-H+Acetate] | 602.3474 | 0.30 [-0.69 - 1.34]   | 5.54E-01  | -0.75 [-2.01 - 0.41]  | 2.17E-01    |
| LPC (20:4), Peak 2 | Lysolipid | [M-H+Acetate] | 602.3475 | 0.74 [-1.02 - 2.61]   | 4.15E-01  | -1.88 [-4.37 - 0.28]  | 1.10E-01    |
| LPC (20:5), Peak 1 | Lysolipid | [M-H+Acetate] | 600.3315 | 0.06 [-0.46 - 0.60]   | 8.11E-01  | -0.55 [-1.25 - 0.10]  | 1.08E-01    |
| LPC (20:5), Peak 2 | Lysolipid | [M-H+Acetate] | 600.3321 | 0.02 [-0.35 - 0.40]   | 9.02E-01  | -0.05 [-0.47 - 0.46]  | 8.10E-01    |
| LPC (22:4), Peak 2 | Lysolipid | [M-H+Acetate] | 630.3779 | 0.51 [-0.16 - 1.20]   | 1.36E-01  | -0.11 [-0.85 - 0.69]  | 7.72E-01    |
| LPE (14:0), Peak 1 | Lysolipid | [M-H]         | 424.2472 | -0.02 [-0.36 - 0.32]  | 9.11E-01  | -0.44 [-0.88 - -0.05] | 3.44E-02    |
| LPE (14:0), Peak 2 | Lysolipid | [M-H]         | 424.2484 | 0.10 [-0.27 - 0.48]   | 5.84E-01  | -0.34 [-0.78 - 0.06]  | 1.08E-01    |
| LPE (15:0), Peak 2 | Lysolipid | [M-H]         | 438.2631 | 0.33 [-0.26 - 0.94]   | 2.85E-01  | -0.61 [-1.35 - 0.08]  | 8.96E-02    |
| LPE (16:0), Peak 1 | Lysolipid | [M-H]         | 452.2788 | 0.14 [-0.58 - 0.87]   | 7.01E-01  | -1.24 [-2.23 - -0.38] | 7.87E-03    |
| LPE (16:0), Peak 2 | Lysolipid | [M-H]         | 452.2787 | 0.16 [-0.55 - 0.88]   | 6.64E-01  | -0.51 [-1.39 - 0.26]  | 2.00E-01    |
| LPE (16:1), Peak 2 | Lysolipid | [M-H]         | 450.2629 | 0.26 [-0.11 - 0.65]   | 1.70E-01  | 0.00 [-0.41 - 0.49]   | 9.96E-01    |
| LPE (17:0), Peak 1 | Lysolipid | [M-H]         | 466.2921 | 0.20 [-0.07 - 0.49]   | 1.55E-01  | -0.07 [-0.37 - 0.23]  | 6.62E-01    |
| LPE (17:0), Peak 2 | Lysolipid | [M-H]         | 466.2939 | 0.15 [-0.31 - 0.62]   | 5.30E-01  | -0.61 [-1.25 - -0.05] | 4.35E-02    |
| LPE (17:1), Peak 1 | Lysolipid | [M-H]         | 464.2784 | 0.34 [-0.16 - 0.86]   | 1.82E-01  | -0.23 [-0.75 - 0.27]  | 3.66E-01    |
| LPE (17:1), Peak 2 | Lysolipid | [M-H]         | 464.2784 | 0.45 [-0.07 - 1.00]   | 9.41E-02  | -0.29 [-0.94 - 0.33]  | 3.67E-01    |



| ID                   | class     | adduct        | m/z      | irAE log(OR)         | irAE pval | RECIST log(OR)        | RECIST pval |
|----------------------|-----------|---------------|----------|----------------------|-----------|-----------------------|-------------|
| LPE (18:0), Peak 1   | Lysolipid | [M-H]         | 480.3077 | -0.04 [-0.65 - 0.58] | 9.09E-01  | -0.59 [-1.37 - 0.13]  | 1.16E-01    |
| LPE (18:0), Peak 2   | Lysolipid | [M-H]         | 480.31   | -0.04 [-0.83 - 0.75] | 9.26E-01  | -1.09 [-2.10 - -0.19] | 2.32E-02    |
| LPE (18:1), Peak 1   | Lysolipid | [M-H]         | 478.2943 | 0.10 [-0.42 - 0.63]  | 7.03E-01  | -0.38 [-1.02 - 0.23]  | 2.34E-01    |
| LPE (18:1), Peak 2   | Lysolipid | [M-H]         | 478.2939 | 0.06 [-0.52 - 0.64]  | 8.45E-01  | -0.10 [-0.75 - 0.59]  | 7.63E-01    |
| LPE (18:2), Peak 1   | Lysolipid | [M-H]         | 476.2781 | 0.07 [-0.41 - 0.56]  | 7.71E-01  | -0.49 [-1.12 - 0.10]  | 1.12E-01    |
| LPE (18:2), Peak 2   | Lysolipid | [M-H]         | 476.2788 | 0.06 [-0.36 - 0.48]  | 7.85E-01  | -0.11 [-0.59 - 0.39]  | 6.09E-01    |
| LPE (18:3), Peak 1   | Lysolipid | [M-H]         | 474.263  | 0.00 [-0.40 - 0.41]  | 9.82E-01  | -0.37 [-0.85 - 0.09]  | 1.19E-01    |
| LPE (18:3), Peak 2   | Lysolipid | [M-H]         | 474.2628 | 0.03 [-0.33 - 0.40]  | 8.67E-01  | -0.16 [-0.57 - 0.25]  | 4.32E-01    |
| LPE (20:2), Peak 1   | Lysolipid | [M-H]         | 504.31   | 0.03 [-0.48 - 0.55]  | 9.07E-01  | -0.35 [-0.97 - 0.23]  | 2.38E-01    |
| LPE (20:2), Peak 2   | Lysolipid | [M-H]         | 504.3099 | 0.41 [-0.12 - 0.97]  | 1.38E-01  | -0.29 [-0.91 - 0.32]  | 3.57E-01    |
| LPE (20:3), Peak 1   | Lysolipid | [M-H]         | 502.2947 | 0.27 [-0.27 - 0.85]  | 3.28E-01  | -0.46 [-1.16 - 0.19]  | 1.76E-01    |
| LPE (20:3), Peak 2   | Lysolipid | [M-H]         | 502.2946 | 0.17 [-0.33 - 0.67]  | 5.06E-01  | -0.21 [-0.81 - 0.38]  | 4.74E-01    |
| LPE (20:4), Peak 1   | Lysolipid | [M-H]         | 500.2789 | 0.83 [0.03 - 1.70]   | 4.99E-02  | -0.12 [-1.03 - 0.82]  | 8.02E-01    |
| LPE (20:4), Peak 2   | Lysolipid | [M-H]         | 500.279  | 1.07 [0.11 - 2.13]   | 3.58E-02  | 0.01 [-1.05 - 1.11]   | 9.83E-01    |
| LPE (20:5), Peak 1   | Lysolipid | [M-H]         | 498.2632 | 0.14 [-0.31 - 0.60]  | 5.40E-01  | -0.49 [-1.13 - 0.08]  | 1.07E-01    |
| LPE (20:5), Peak 2   | Lysolipid | [M-H]         | 498.2632 | 0.19 [-0.29 - 0.69]  | 4.34E-01  | -0.47 [-1.12 - 0.12]  | 1.31E-01    |
| LPE (22:4), Peak 1   | Lysolipid | [M-H]         | 528.3026 | 0.48 [-0.46 - 1.44]  | 3.10E-01  | 0.03 [-1.02 - 1.05]   | 9.59E-01    |
| LPE (22:4), Peak 2   | Lysolipid | [M-H]         | 528.3026 | 0.37 [-0.83 - 1.66]  | 5.52E-01  | -1.45 [-3.37 - 0.10]  | 1.01E-01    |
| LPI (16:0)           | Lysolipid | [M-H]         | 571.292  | 0.70 [-0.36 - 1.76]  | 1.96E-01  | 0.73 [-0.64 - 2.11]   | 2.94E-01    |
| LPI (18:0)           | Lysolipid | [M-H]         | 599.319  | 0.51 [-0.24 - 1.27]  | 1.81E-01  | 0.52 [-0.35 - 1.55]   | 2.86E-01    |
| LPI (18:1)           | Lysolipid | [M-H]         | 597.3002 | 0.17 [-0.07 - 0.42]  | 1.65E-01  | 0.05 [-0.20 - 0.31]   | 6.78E-01    |
| LPI (18:2)           | Lysolipid | [M-H]         | 595.2843 | -0.08 [-0.12 - 0.41] | 7.63E-01  | 0.00 [-0.59 - 0.59]   | 9.93E-01    |
| LPI (20:4)           | Lysolipid | [M-H]         | 619.2946 | 0.12 [-0.23 - 0.46]  | 5.04E-01  | 0.21 [-0.20 - 0.62]   | 3.18E-01    |
| LysoPAF (16:0)       | Lysolipid | [M+Cl-]       | 516.3226 | 0.04 [-0.95 - 1.04]  | 9.29E-01  | -1.22 [-2.65 - 0.05]  | 7.38E-02    |
| 11-keto-testosterone | Sterol    | [M-H+Acetate] | 361.2029 | -0.08 [-0.23 - 0.06] | 2.55E-01  | 0.07 [-0.08 - 0.24]   | 3.55E-01    |
| Aldosterone          | Sterol    | [M-H+Acetate] | 419.2101 | 0.03 [-0.08 - 0.14]  | 5.90E-01  | 0.03 [-0.09 - 0.16]   | 6.03E-01    |

## Supplementary Table 4

### Sub-Cohort from FINRISK-2002

|             | <b>Control</b> | <b>Autoimmune</b> | <b>p-value</b> |
|-------------|----------------|-------------------|----------------|
| n           | 1712           | 158               | --             |
| Male (%)    | 651 (38)       | 54 (34)           | 0.34           |
| Age (Range) | 39 (24-72)     | 53 (25-74)        | 0.003          |
| BMI (Range) | 24 (16-48)     | 27 (18-41)        | 0.45           |

## Supplementary Table 5

| Description                                                                                     | Category                  | LPC (18:2)<br>Standard |             |                 | LPC (16:0)<br>Standard |             |                 |
|-------------------------------------------------------------------------------------------------|---------------------------|------------------------|-------------|-----------------|------------------------|-------------|-----------------|
|                                                                                                 |                           | Effect Size            | Error       | P-Value         | Effect Size            | Error       | P-Value         |
| Other cheeses                                                                                   | Dairy                     | <b>0.50</b>            | <b>0.09</b> | <b>2.94E-06</b> | 0.15                   | 0.10        | 3.61E-01        |
| Low-fat cheese                                                                                  | Dairy                     | -0.21                  | 0.09        | 1.21E-01        | 0.01                   | 0.10        | 9.67E-01        |
| Cultured milk or<br>yoghurt                                                                     | Dairy                     | 0.07                   | 0.09        | 6.95E-01        | -0.02                  | 0.10        | 9.57E-01        |
| Sweet cookies<br>or pies                                                                        | Dessert,<br>Carbohydrates | <b>0.56</b>            | <b>0.09</b> | <b>1.37E-07</b> | 0.13                   | 0.10        | 4.85E-01        |
| DELICACIES                                                                                      | Dessert,<br>Carbohydrates | <b>0.40</b>            | <b>0.09</b> | <b>3.52E-04</b> | 0.10                   | 0.10        | 5.94E-01        |
| Sugared soft<br>drinks                                                                          | Dessert,<br>Carbohydrates | <b>0.33</b>            | <b>0.10</b> | <b>8.70E-03</b> | 0.23                   | 0.10        | 1.35E-01        |
| Dark wheat or<br>mixed grain<br>bread                                                           | Dessert,<br>Carbohydrates | <b>0.31</b>            | <b>0.09</b> | <b>1.13E-02</b> | -0.14                  | 0.10        | 4.45E-01        |
| FIBER_RICH_B<br>READ                                                                            | Dessert,<br>Carbohydrates | <b>0.31</b>            | <b>0.09</b> | <b>1.13E-02</b> | -0.01                  | 0.10        | 9.61E-01        |
| Low-calorie soft<br>drinks                                                                      | Dessert,<br>Carbohydrates | -0.25                  | 0.10        | 9.53E-02        | 0.03                   | 0.11        | 9.19E-01        |
| Macaroni, pasta<br>or rice                                                                      | Dessert,<br>Carbohydrates | -0.20                  | 0.10        | 1.60E-01        | -0.22                  | 0.10        | 1.35E-01        |
| Pastries                                                                                        | Dessert,<br>Carbohydrates | 0.20                   | 0.10        | 1.64E-01        | 0.07                   | 0.10        | 7.27E-01        |
| Chocolate                                                                                       | Dessert,<br>Carbohydrates | 0.20                   | 0.09        | 1.71E-01        | -0.12                  | 0.10        | 5.00E-01        |
| Rye bread, rye<br>crisp                                                                         | Dessert,<br>Carbohydrates | 0.18                   | 0.10        | 2.61E-01        | 0.13                   | 0.11        | 5.14E-01        |
| Candy                                                                                           | Dessert,<br>Carbohydrates | 0.07                   | 0.09        | 6.95E-01        | 0.06                   | 0.10        | 7.72E-01        |
| Ice cream etc                                                                                   | Dessert,<br>Carbohydrates | 0.06                   | 0.10        | 7.52E-01        | -0.04                  | 0.10        | 8.31E-01        |
| White bread                                                                                     | Dessert,<br>Carbohydrates | 0.06                   | 0.10        | 7.72E-01        | 0.08                   | 0.10        | 7.01E-01        |
| Diabetic diet                                                                                   | Diet                      | <b>-1.38</b>           | <b>0.31</b> | <b>2.64E-04</b> | <b>-1.14</b>           | <b>0.30</b> | <b>3.64E-03</b> |
| Weight diet                                                                                     | Diet                      | <b>-0.91</b>           | <b>0.22</b> | <b>7.54E-04</b> | -0.10                  | 0.23        | 8.29E-01        |
| Meals                                                                                           | Diet                      | <b>0.30</b>            | <b>0.10</b> | <b>2.09E-02</b> | 0.25                   | 0.10        | 8.82E-02        |
| Healthiness of<br>eating habits /<br>range 1-5,<br>greater number<br>equals<br>unhealthier diet | Diet                      | -0.16                  | 0.10        | 3.65E-01        | 0.19                   | 0.11        | 2.93E-01        |
| Low cholesterol<br>diet                                                                         | Diet                      | -0.26                  | 0.17        | 3.66E-01        | 0.17                   | 0.18        | 6.37E-01        |
| FIBER_TOTAL                                                                                     | Diet                      | 0.12                   | 0.09        | 4.94E-01        | 0.16                   | 0.10        | 3.43E-01        |
| Lactose-free diet                                                                               | Diet                      | 0.14                   | 0.16        | 6.65E-01        | 0.02                   | 0.17        | 9.60E-01        |
| Store bought<br>ready-to-eat<br>meals                                                           | Diet                      | 0.06                   | 0.10        | 7.52E-01        | -0.18                  | 0.10        | 3.09E-01        |
| Glutein-free diet                                                                               | Diet                      | -0.23                  | 0.51        | 8.28E-01        | -0.65                  | 0.52        | 5.00E-01        |
| Vegetarian                                                                                      | Diet                      | 0.04                   | 0.31        | 9.60E-01        | -0.35                  | 0.32        | 5.84E-01        |
| Fresh salad and<br>vegetables                                                                   | Fruits,<br>Vegetables     | <b>0.29</b>            | <b>0.09</b> | <b>2.10E-02</b> | 0.09                   | 0.10        | 6.50E-01        |
| Fruit and berry<br>juices                                                                       | Fruits,<br>Vegetables     | 0.19                   | 0.09        | 1.71E-01        | <b>0.27</b>            | <b>0.10</b> | <b>4.22E-02</b> |
| Fresh or frozen<br>berries                                                                      | Fruits,<br>Vegetables     | -0.17                  | 0.09        | 2.31E-01        | 0.07                   | 0.10        | 7.20E-01        |
| HEALTHY_VEG<br>ETABLES                                                                          | Fruits,<br>Vegetables     | 0.14                   | 0.09        | 3.89E-01        | 0.16                   | 0.10        | 3.38E-01        |

|                                  |                    |              |             |                 |              |             |                 |
|----------------------------------|--------------------|--------------|-------------|-----------------|--------------|-------------|-----------------|
| Cooked vegetables                | Fruits, Vegetables | 0.09         | 0.09        | 6.20E-01        | 0.18         | 0.10        | 2.31E-01        |
| Cooked or mashed potatoes        | Fruits, Vegetables | 0.09         | 0.10        | 6.29E-01        | 0.13         | 0.10        | 4.91E-01        |
| Fruits                           | Fruits, Vegetables | -0.07        | 0.09        | 7.27E-01        | -0.02        | 0.10        | 9.57E-01        |
| Vegetarian foods                 | Fruits, Vegetables | 0.02         | 0.09        | 9.41E-01        | 0.06         | 0.10        | 7.43E-01        |
| FRUITS_BERRIES                   | Fruits, Vegetables | 0.01         | 0.09        | 9.74E-01        | 0.20         | 0.10        | 1.73E-01        |
| CEREALS                          | Grains or Nuts     | 0.20         | 0.09        | 1.53E-01        | 0.02         | 0.10        | 9.57E-01        |
| Nuts                             | Grains or Nuts     | 0.25         | 0.14        | 2.79E-01        | -0.09        | 0.15        | 7.52E-01        |
| Herbs                            | Grains or Nuts     | -0.13        | 0.10        | 4.55E-01        | 0.10         | 0.10        | 6.29E-01        |
| Seeds                            | Grains or Nuts     | 0.08         | 0.14        | 7.85E-01        | 0.01         | 0.15        | 9.76E-01        |
| Muesli or cereal                 | Grains or Nuts     | 0.03         | 0.10        | 9.31E-01        | -0.02        | 0.10        | 9.57E-01        |
| Spreads                          | Oils               | <b>0.52</b>  | <b>0.10</b> | <b>2.66E-06</b> | 0.14         | 0.10        | 4.55E-01        |
| Dressing                         | Oils               | <b>0.32</b>  | <b>0.09</b> | <b>8.70E-03</b> | 0.02         | 0.10        | 9.57E-01        |
| Salmon                           | Protein            | <b>-0.53</b> | <b>0.10</b> | <b>2.66E-06</b> | <b>-0.31</b> | <b>0.10</b> | <b>2.20E-02</b> |
| Fish and fish dishes             | Protein            | <b>-0.40</b> | <b>0.10</b> | <b>7.54E-04</b> | -0.21        | 0.10        | 1.60E-01        |
| Sausages and wieners             | Protein            | <b>0.31</b>  | <b>0.09</b> | <b>1.13E-02</b> | 0.20         | 0.10        | 1.79E-01        |
| Herring                          | Protein            | <b>-0.33</b> | <b>0.11</b> | <b>2.77E-02</b> | -0.17        | 0.12        | 4.12E-01        |
| WHITE_MEAT                       | Protein            | <b>-0.28</b> | <b>0.09</b> | <b>2.77E-02</b> | -0.18        | 0.10        | 2.46E-01        |
| Cold cuts (e.g. salami)          | Protein            | 0.23         | 0.09        | 8.72E-02        | 0.14         | 0.10        | 4.12E-01        |
| Other fish                       | Protein            | -0.21        | 0.09        | 1.37E-01        | 0.00         | 0.10        | 9.90E-01        |
| Soy                              | Protein            | 0.35         | 0.16        | 1.45E-01        | 0.35         | 0.17        | 1.78E-01        |
| RED_MEAT                         | Protein            | 0.18         | 0.09        | 2.15E-01        | 0.16         | 0.10        | 2.97E-01        |
| PROCESSED_MEAT                   | Protein            | 0.17         | 0.09        | 2.31E-01        | 0.13         | 0.10        | 4.14E-01        |
| Cold meat cuts (e.g. cooked ham) | Protein            | -0.14        | 0.09        | 3.89E-01        | 0.02         | 0.10        | 9.57E-01        |
| Meat dishes                      | Protein            | 0.09         | 0.10        | 6.51E-01        | 0.18         | 0.10        | 2.79E-01        |
| Poultry meat                     | Protein            | -0.07        | 0.10        | 7.21E-01        | -0.08        | 0.10        | 7.08E-01        |
| Eggs                             | Protein            | 0.06         | 0.09        | 7.32E-01        | 0.06         | 0.10        | 7.77E-01        |
| JUNK_FOOD                        | Unhealthy Foods    | <b>0.29</b>  | <b>0.09</b> | <b>2.20E-02</b> | 0.08         | 0.10        | 7.01E-01        |
| Fried potatoes or french fries   | Unhealthy Foods    | <b>0.28</b>  | <b>0.10</b> | <b>3.97E-02</b> | 0.10         | 0.10        | 6.22E-01        |
| Pizza                            | Unhealthy Foods    | 0.27         | 0.10        | 7.92E-02        | -0.10        | 0.11        | 6.49E-01        |
| Salty snacks                     | Unhealthy Foods    | 0.27         | 0.12        | 1.30E-01        | 0.11         | 0.12        | 6.75E-01        |
| Fast food                        | Unhealthy Foods    | 0.05         | 0.13        | 8.73E-01        | 0.04         | 0.13        | 9.32E-01        |
| Burgers                          | Unhealthy Foods    | 0.03         | 0.12        | 9.41E-01        | -0.02        | 0.13        | 9.55E-01        |
